# Supplementary material for: Streamlining Care in Crisis: Rapid Creation and Implementation of a Digital Support Tool for COVID-19
Source: PubMed Central journal article supplement (PMC7514410; doi:10.5811/westjem.2020.7.48537), 2020-08-17
Supplement: wjem-21-1095-s001.pdf [file wjem-21-1095-s001.pdf]

## APPENDIX A: zsfCOVID Decision Support Tool User Survey

1) **Demographic Information**

- a. Role
- b. Residency Graduation Year (if applicable)

2) **Prior to the zsfCOVID platform, I felt confident in accessing up-to-date COVID-related workflows and policies at ZSFG.**

Strongly Disagree                      Disagree                      Agree                      Strongly Agree

3) **Since the launch of the zsfCOVID platform, I am able to more easily access up-to-date COVID-related workflows and policies at ZSFG.**

Strongly Disagree                      Disagree                      Agree                      Strongly Agree

4) **I find the zsfCOVID platform useful in my job.**

Strongly Disagree                      Disagree                      Agree                      Strongly Agree

5) **The zsfCOVID platform has affected my management of COVID patients.**

Strongly Disagree                      Disagree                      Agree                      Strongly Agree

6) **I use the zsfCOVID platform approximately:**

Never    Once per month                      Once per week                      Multiple times per week                      Daily

7) **Select the components of the zsfCOVID platform you find most useful (up to 3).**

Equipment-related protocols / Testing-related protocols / Treatment-related protocols / Quick-links

8) **How likely is it that you would recommend the zsfCOVID platform to a colleague?**

Very Unlikely                      Neutral                      Very Likely  
0    1    2                      3                      4                      5                      6                      7                      8                      9                      10

9) **What would you like to see improved or added to the zsfCOVID platform? (short answer)**
